# Supplementary material for: Novel epigenetic network biomarkers for early detection of esophageal cancer
Source: PubMed Central journal article supplement (PMC8845366; doi:10.1186/s13148-022-01243-5), 2022-02-14
Supplement: 13148_2022_1243_MOESM1_ESM.pdf [file 13148_2022_1243_MOESM1_ESM.pdf]

# Supplementary Information for “Novel epigenetic network biomarkers for early detection of esophageal cancer”

## SUPPLEMENTARY FIGURES

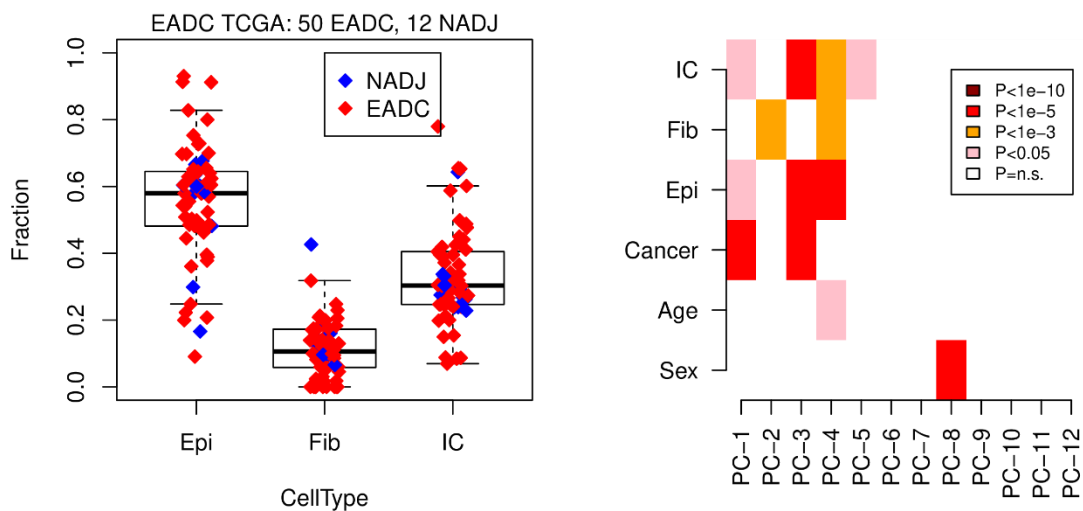

**SI fig.S1: Estimation of cell-type fractions in esophageal adenocarcinoma TCGA cohort.** Left panel is a boxplot displaying the estimated total epithelial (Epi), total fibroblast (Fib) and total immune cell (IC) fractions, with datapoints colored by normal-adjacent (NADJ) and EAC/EADC status. Right panel is a heatmap of correlation P-values between top PCs and various factors including the cell-type fractions, Cancer-status, Age and Sex.

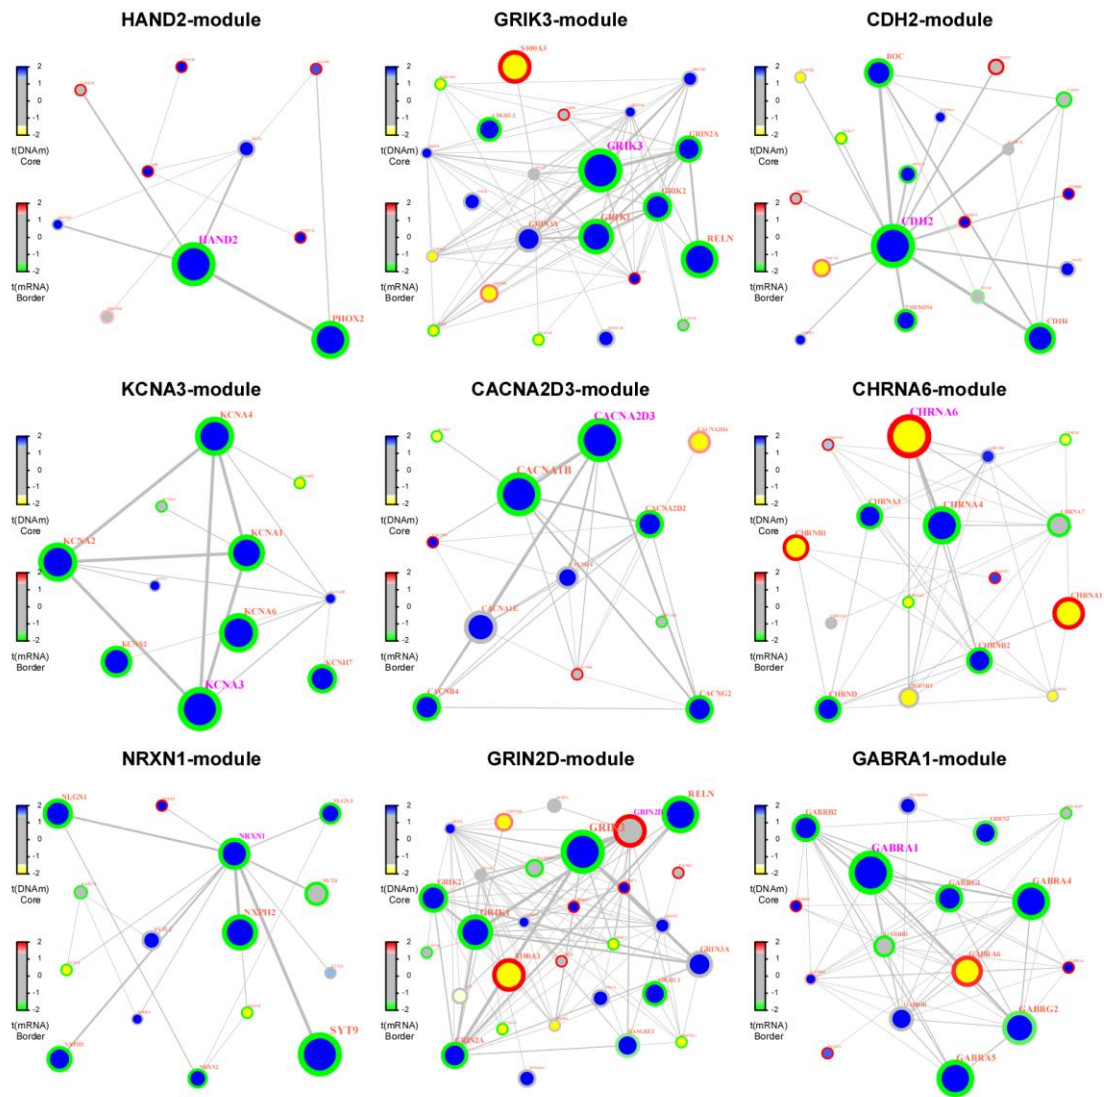

**SI fig.S2: FEM-modules derived from EAC TCGA cohort.** We display 9 of the 12 FEM-modules representing network hotspots of differential DNAm and mRNA expression in EAC compared to normal-adjacent tissue. Node colors indicate differential DNAm, border colors indicate differential expression, as indicated.

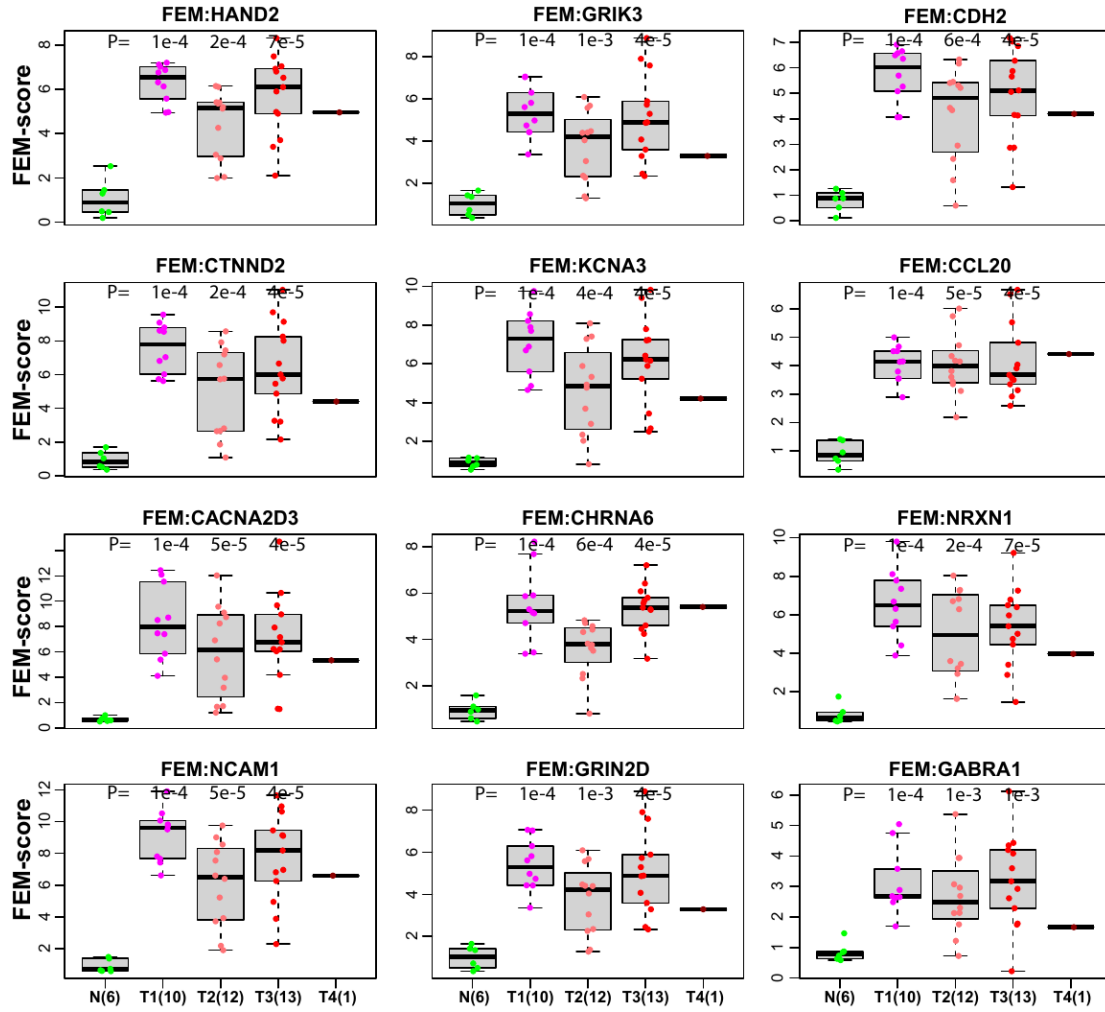

**SI fig.S3: FEM-score patterns of modules across EAC-stages.** For each of the 12 FEM modules, we display boxplots comparing the FEM-activation scores of each module across normal (N) and EAC stratified by stage (T1-T4). Number of samples in each group is given below each boxplot. The P-values are derived from a one-tailed Wilcoxon test comparing each group to N. For T4 we don't display P-value because only 1 sample was T4.

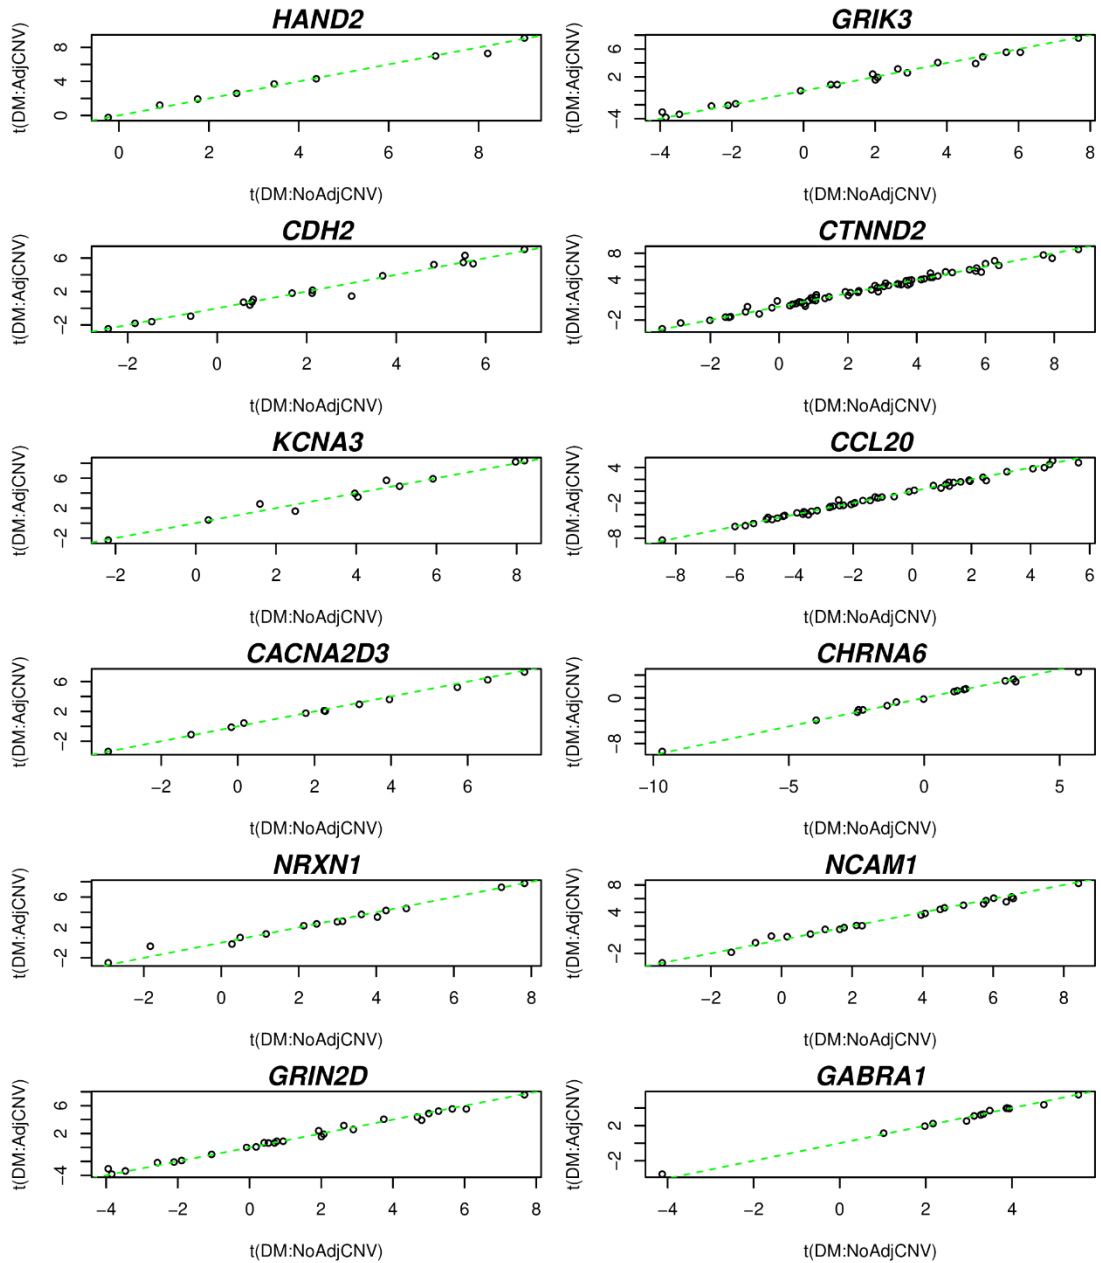

**SI fig.S4: Robustness of differential DNAm statistics to CNV.** For each of the 12 FEM modules, we display a scatterplot of the t-statistics of differential DNAm (DM) without adjustment for CNV (x-axis) vs the corresponding t-statistics upon adjustment for CNV (y-axis). Each data point represents a gene within the module. Green dashed line indicates the line of unit gradient (i.e. the line of a perfect Pearson Correlation of 1 and a RMSE of 0).

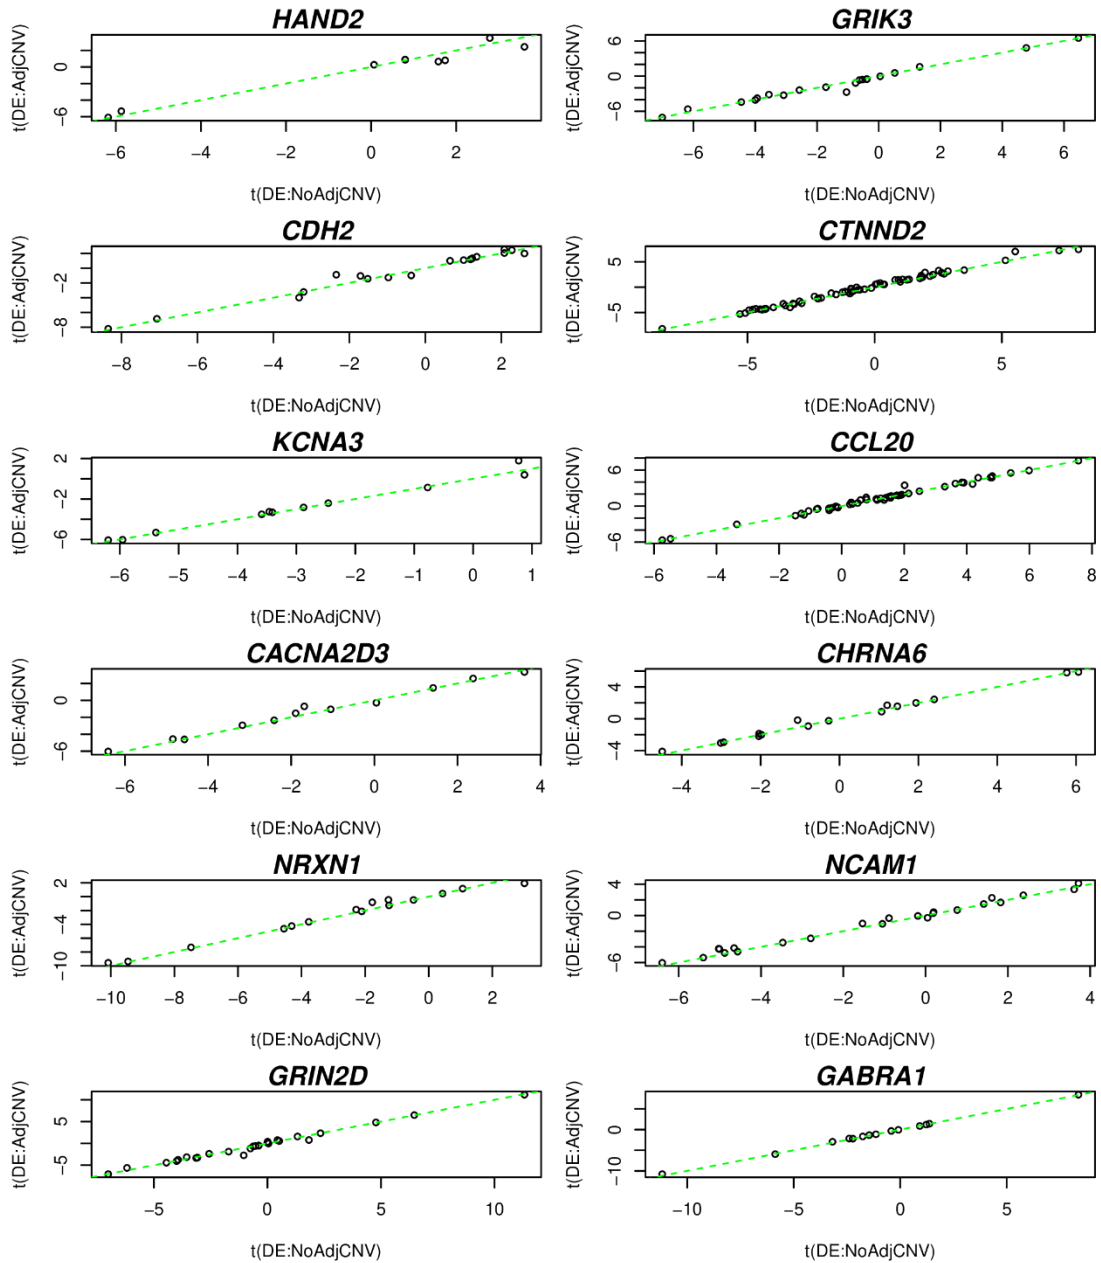

**SI fig.S5: Robustness of differential mRNA statistics to CNV.** For each of the 12 FEM modules, we display a scatterplot of the t-statistics of differential expression (DE) without adjustment for CNV (x-axis) vs the corresponding t-statistics upon adjustment for CNV (y-axis). Each data point represents a gene within the module. Green dashed line indicates the line of unit gradient (i.e. the line of a perfect Pearson Correlation of 1 and a RMSE of 0).

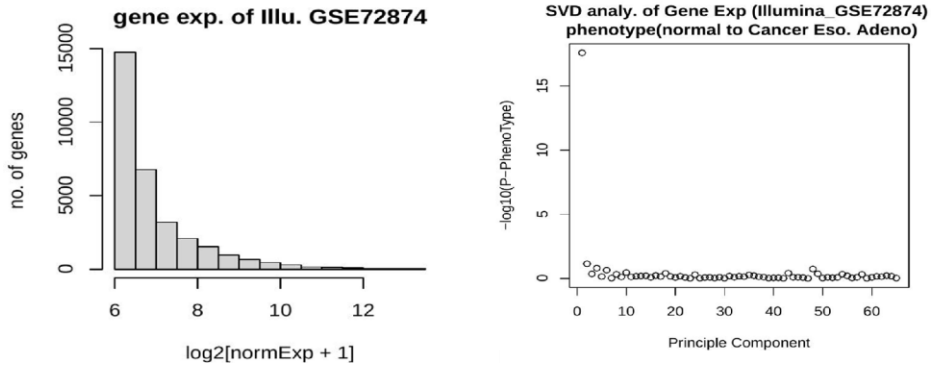

**SI fig.S6: SVD analysis on GSE72874 gene-expression EAC dataset.** Left panel: histogram of normalized gene-expression values. Right panel: Significance of correlation between top principal components and normal-cancer status.

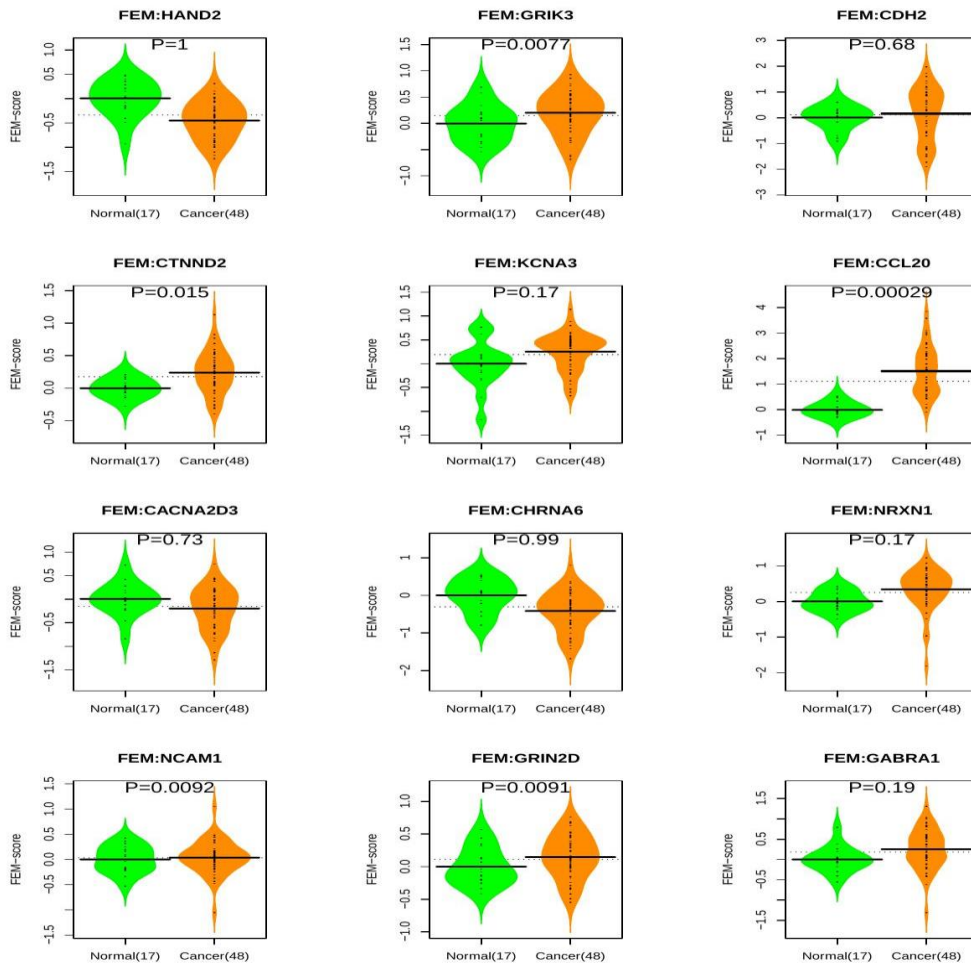

**SI fig.S7: Association of FEM-scores in normal-cancer status in GSE72874 gene-expression dataset.** Violin plots of FEM-scores for each of the 12 gene-modules. P-value is from a linear model of FEM-score against normal-cancer status with estimated IC cell fraction as covariate. Relative IC fraction was quantified using GSVA.

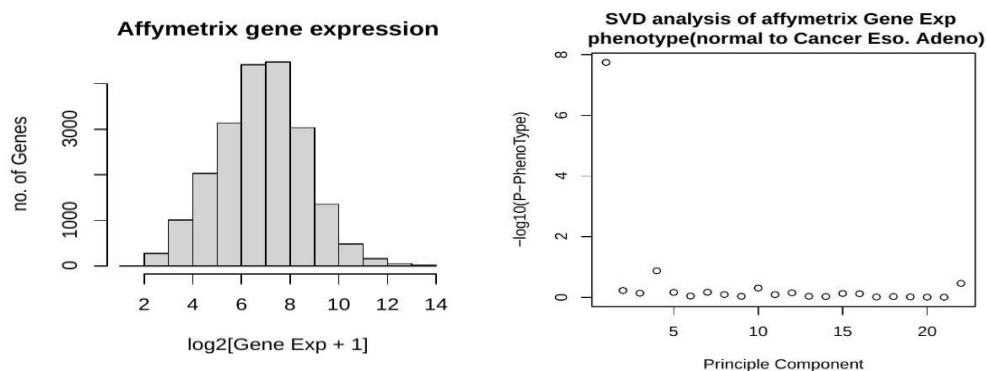

**SI fig.S8: SVD analysis on GSE92396 Affymetrix gene-expression EAC dataset.** Left panel: histogram of normalized gene-expression values. Right panel: Significance of correlation between top principal components and normal-cancer status.

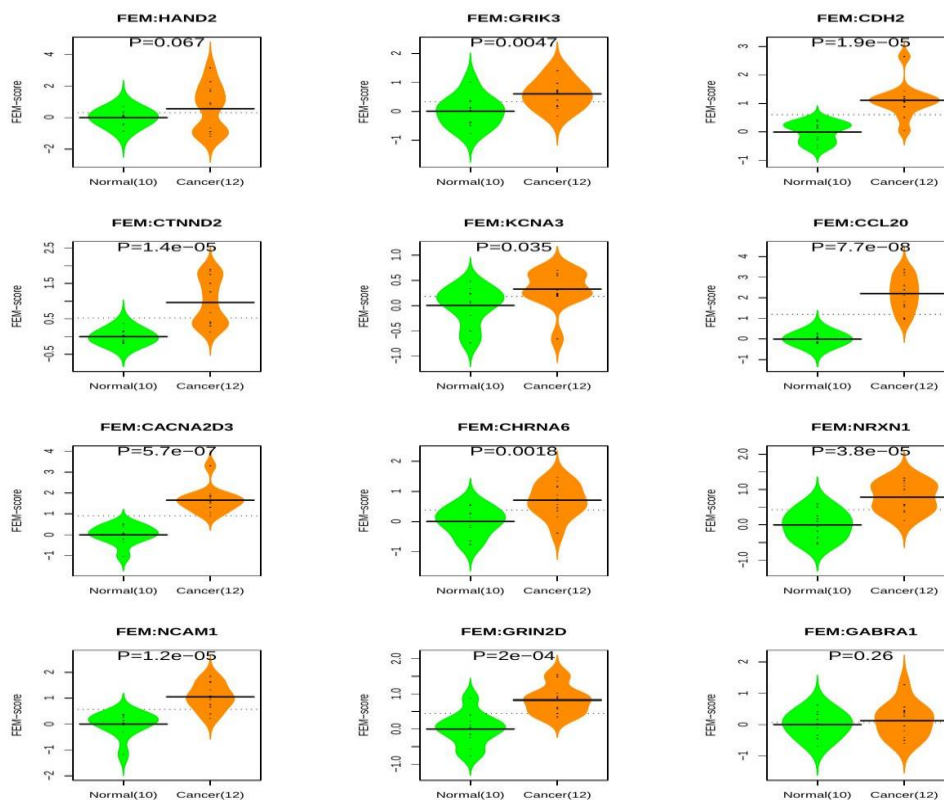

**SI fig.S9: Association of FEM-scores in normal-cancer status in GSE92396 gene-expression dataset.** Violin plots of FEM-scores for each of the 12 gene-modules. P-value is from a linear model of FEM-score against normal-cancer status with estimated

IC cell fraction as covariate. The relative IC fraction was quantified using GSVA.



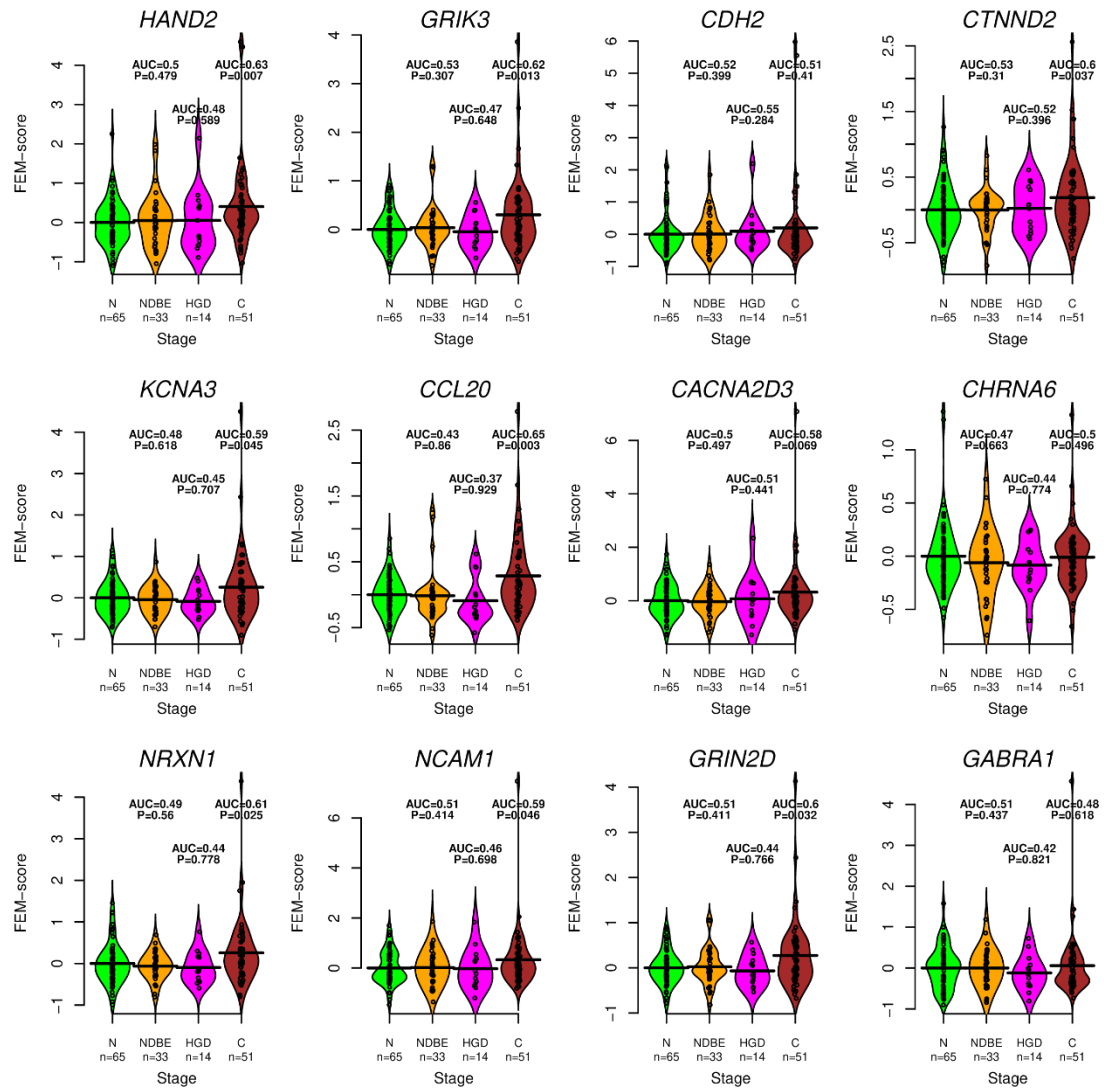

**SI fig.S10: Association of FEM-scores in saliva cohort-1.** For each of the 12 modules, we display violin plots of the estimated FEM-scores in saliva cohort-1 across the 4 disease stages. N=normal, NDBE=non-dysplastic Barrett's Esophagus, HGD=high-grade dysplasia, C=Esophageal Adenocarcinoma. The number of samples in each stage is given below each violin plot. The AUC and P-values derive from a one-tailed Wilcoxon rank sum-test comparing the NDBE, HGD and C stages to the normal-state

N.

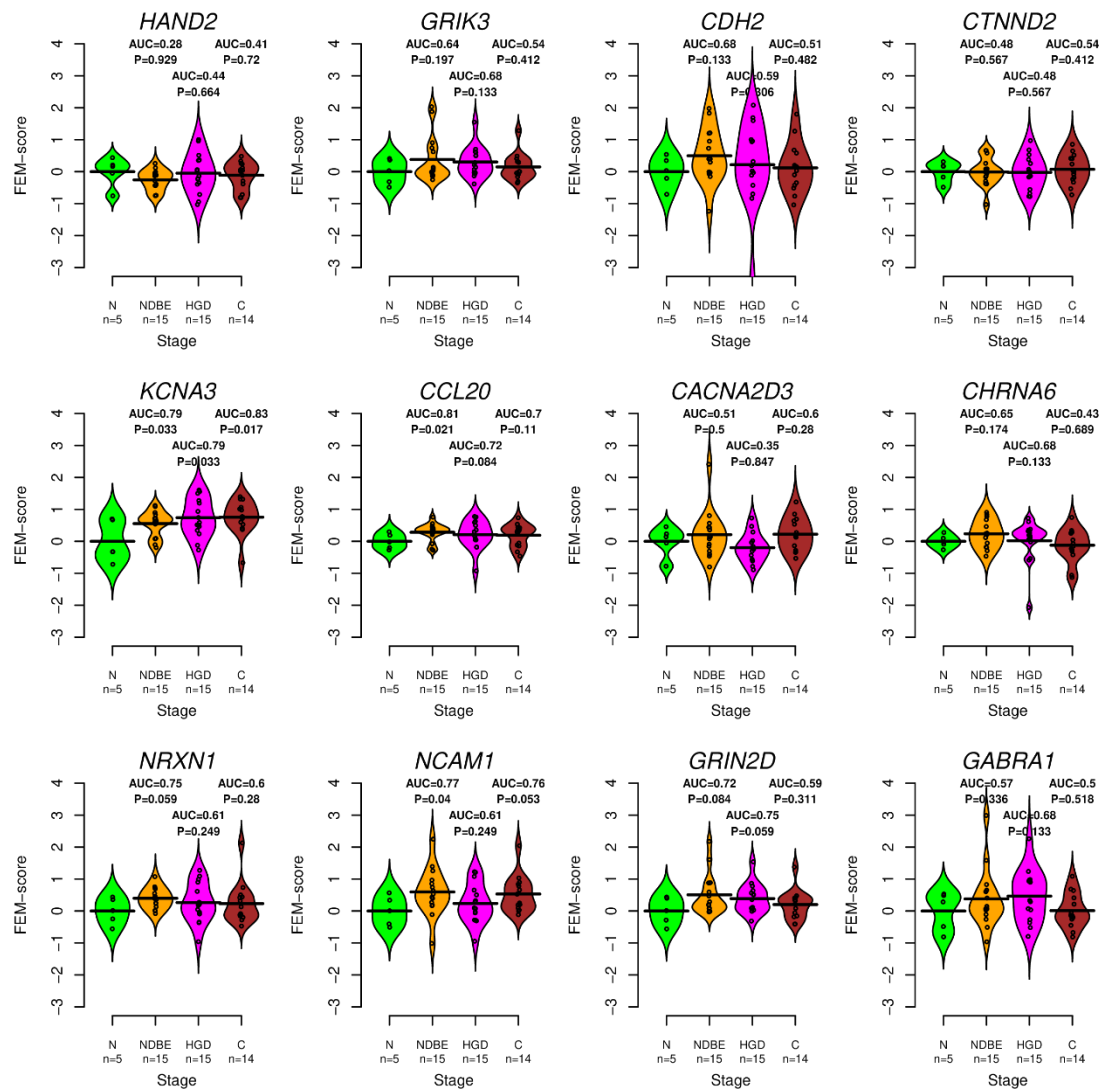

**SI fig.S11: Association of FEM-scores in saliva cohort-2.** For each of the 12 modules, we display violin plots of the estimated FEM-scores in saliva cohort-2 across the 4 disease stages. N=normal, NDBE=non-dysplastic Barrett's Esophagus, HGD=high-grade dysplasia, C=Esophageal Adenocarcinoma. The number of samples in each stage is given below each violin plot. The AUC and P-values derive from a one-tailed Wilcoxon rank sum-test comparing the NDBE, HGD and C stages to the normal-state N.

## SUPPLEMENTARY TABLES

| EntrezID<br>(topSeed) | Symbol<br>(topSeed) | Size | Mod  | P     | Gene                                                                                                                                                                                                                                                                                                                                                                                                                                                                                                                                                                                                                                                                                                                                                                                                                                                                       |
|-----------------------|---------------------|------|------|-------|----------------------------------------------------------------------------------------------------------------------------------------------------------------------------------------------------------------------------------------------------------------------------------------------------------------------------------------------------------------------------------------------------------------------------------------------------------------------------------------------------------------------------------------------------------------------------------------------------------------------------------------------------------------------------------------------------------------------------------------------------------------------------------------------------------------------------------------------------------------------------|
| 9464                  | HAND2               | 10   | 4.99 | 0.016 | <b>HAND2</b> CENPB HEYL <b>HAND1</b> <b>PHOX2A</b> <b>ATF6B</b> <b>SP8</b><br>MBTPS2 ZNF519 <b>ZNF273</b>                                                                                                                                                                                                                                                                                                                                                                                                                                                                                                                                                                                                                                                                                                                                                                  |
| 2899                  | GRIK3               | 22   | 3.75 | 0.049 | <b>GRIK3</b> <b>GRIN2A</b> DLG3 <b>GRIN1</b> HAP1 <b>GRIN2B</b><br>GRIN2C <b>GRIK4</b> <b>GRIK5</b> <b>GRIN3A</b> <b>GRIK1</b> <b>GRIK2</b><br><b>GRIN3B</b> <b>S100A3</b> <b>RELN</b> <b>LRP8</b> <b>SHANK1</b> LIN7B<br>NCALD <b>ADGRL2</b> <b>SEMA4C</b> PPOX                                                                                                                                                                                                                                                                                                                                                                                                                                                                                                                                                                                                           |
| 1000                  | CDH2                | 18   | 6.98 | 0.003 | <b>CDH2</b> IARS2 MAPK12 <b>CDH4</b> <b>CDH11</b> <b>PTPRO</b> <b>BOC</b><br>CDON <b>ARVCF</b> <b>LRRC7</b> <b>PTPN22</b> PTPRG PTPN7<br>NACA2 <b>TMEM256</b> NENF <b>PTPRR</b> NTN3                                                                                                                                                                                                                                                                                                                                                                                                                                                                                                                                                                                                                                                                                       |
| 1501                  | CTNND2              | 67   | 4.78 | 0.001 | <b>CTNND2</b> SPHK1 <b>PCDH7</b> CDH15 <b>CDH4</b> <b>CDH10</b><br><b>CDH11</b> CDH13 CDH16 <b>CDH17</b> <b>CDH18</b> CDH19<br>CDH20 <b>CDH22</b> <b>CDH23</b> CDH3 <b>CDH5</b> <b>CDH6</b> <b>CDH8</b><br><b>CDH9</b> <b>CDHR1</b> <b>CDHR2</b> CELSR1 CELSR2 <b>CELSR3</b><br><b>DCHS1</b> <b>FAT3</b> <b>PCDH10</b> <b>PCDH11X</b> <b>PCDH11Y</b><br>PCDH12 <b>PCDH15</b> <b>PCDH18</b> <b>PCDH20</b> <b>PCDH8</b><br><b>PCDHA1</b> <b>PCDHB10</b> <b>PCDHB11</b> <b>PCDHB12</b> <b>PCDHB13</b><br><b>PCDHB14</b> <b>PCDHB15</b> <b>PCDHB16</b> <b>PCDHB1</b> <b>PCDHB2</b><br><b>PCDHB3</b> <b>PCDHB4</b> <b>PCDHB5</b> <b>PCDHB6</b> <b>PCDHB7</b><br><b>PCDHB8</b> <b>PCDHGA1</b> <b>LRRC7</b> ORAI1 <b>CTNNA2</b><br><b>CTNNA3</b> CTNNAL1 <b>SPHKAP</b> <b>PCDH17</b> CDON <b>BOC</b><br>NTN3 <b>PROM1</b> <b>ATP2C2</b> <b>CTNNBIP1</b> <b>P2RX4</b> <b>MYO7A</b> |
| 3738                  | KCNA3               | 11   | 7.45 | 0.001 | <b>KCNA3</b> <b>KCNA2</b> <b>KCNA4</b> <b>KCNA1</b> <b>KCNAB3</b> <b>KCNE4</b><br>ETV1 <b>KCNS2</b> <b>KCNA6</b> DLGAP1 <b>KCNH7</b>                                                                                                                                                                                                                                                                                                                                                                                                                                                                                                                                                                                                                                                                                                                                       |
| 6364                  | CCL20               | 56   | 3.51 | 0.018 | <b>CCL20</b> <b>FPR1</b> <b>CCR5</b> CXCR4 RALBP1 C5AR1 <b>FPR3</b><br><b>CCR1</b> <b>CCR3</b> CCR4 CCR7 <b>CCR8</b> CCR9 <b>CCRL2</b> <b>CXCR5</b><br><b>CCL22</b> <b>CCL8</b> <b>CCL7</b> <b>CCL4</b> <b>CCL3</b> <b>CCL18</b> <b>CCL27</b> <b>CX3CL1</b><br>CCL2 <b>CCL26</b> CCL11 <b>CXCR1</b> <b>CCL13</b> CCL5 <b>MMP3</b><br>ACKR1 <b>CCL1</b> <b>SPOCK3</b> <b>PF4</b> TPST1 SPOCK2 <b>CMKLR1</b><br>TPST2 <b>SPOCK1</b> <b>MMP1</b> BCAN <b>MMP13</b> <b>ADAMT5</b><br>ACAN CMA1 <b>MMP20</b> <b>HAPLN1</b> <b>MMP10</b> <b>MMP7</b><br>TNN <b>MMP14</b> IGFBP3 C5AR2 TNFAIP6 <b>CCL24</b><br>MMP19                                                                                                                                                                                                                                                              |
| 55799                 | CACNA2D3            | 12   | 5.9  | 0.002 | <b>CACNA2D3</b> CACNB1 <b>CACNA1E</b> <b>CACNG2</b> <b>CACNG4</b><br><b>CACNA1B</b> <b>CACNB3</b> <b>CACNB4</b> <b>CACNA2D2</b> MRFAP1<br>RGS12 <b>CACNA2D4</b>                                                                                                                                                                                                                                                                                                                                                                                                                                                                                                                                                                                                                                                                                                            |
| 8973                  | CHRNA6              | 16   | 3.87 | 0.048 | <b>CHRNA6</b> <b>CHRNA7</b> <b>CHRNA4</b> <b>CHRN3</b> <b>CHRN2</b><br><b>CHRN4</b> <b>CHRNA3</b> <b>CHRNA5</b> <b>CHRN1</b> <b>CHRN5</b><br><b>CHRNA1</b> <b>CHRNE</b> CHRNA2 <b>CHRN1</b> RAPSN                                                                                                                                                                                                                                                                                                                                                                                                                                                                                                                                                                                                                                                                          |

|      |        |    |      |       |                                                                                                                                                                                                                                                                                                                                        |
|------|--------|----|------|-------|----------------------------------------------------------------------------------------------------------------------------------------------------------------------------------------------------------------------------------------------------------------------------------------------------------------------------------------|
|      |        |    |      |       | CHRNA9                                                                                                                                                                                                                                                                                                                                 |
| 9378 | NRXN1  | 15 | 5.98 | 0.018 | <b>NRXN1</b> SYT9 <b>NLGN1</b> <b>NXPH3</b> SYTL2 <b>NLGN2</b><br><b>NLGN3</b> <b>RPH3A</b> SYT4 SYTL1 NXPH1 <b>NXPH2</b> SYT13<br><b>NRXN2</b> RAB27B                                                                                                                                                                                 |
| 4684 | NCAM1  | 24 | 5.82 | 0.001 | <b>NCAM1</b> <b>CACNA1D</b> <b>GDNF</b> <b>GFRA1</b> <b>FGF19</b> <b>NCAN</b><br>CACNB1 <b>GFRA2</b> <b>GFRA4</b> <b>ARTN</b> <b>CACNB3</b> <b>CACNB4</b><br><b>NRTN</b> PSPN <b>ST8SIA2</b> <b>ST8SIA3</b> <b>ST8SIA4</b> <b>CACNA2D3</b><br><b>CACNA1E</b> <b>CACNG4</b> <b>DOK5</b> <b>GFRA3</b> <b>CACNA2D4</b> TNN                |
| 2906 | GRIN2D | 29 | 3.9  | 0.02  | <b>GRIN2D</b> <b>SHANK1</b> <b>GRIN1</b> HAP1 RASGRF1 CIT<br><b>GRIK2</b> DUSP4 <b>RASGRF2</b> <b>GRIK1</b> <b>GRIK3</b> <b>GRIK4</b><br><b>GRIK5</b> <b>NANOS1</b> <b>GRIN3A</b> GRIN2C <b>GRIN2A</b> <b>GRIN3B</b><br>DLG3 <b>S100A3</b> <b>GRIN2B</b> <b>RELN</b> <b>LRP8</b> PANK2 LIN7B<br>NCALD <b>ADGRL2</b> <b>SEMA4C</b> PPOX |
| 2554 | GRBRA1 | 16 | 4.46 | 0.021 | <b>GABRA1</b> <b>GABRB1</b> <b>GABRB3</b> <b>GABRA3</b> <b>GABRA4</b><br><b>GABRB2</b> <b>GABRG2</b> <b>GABRQ</b> <b>GABRA6</b> <b>GABRG1</b><br><b>GABRA5</b> GABRD <b>ARHGEF9</b> <b>DGAT1</b> NEUROD4<br>LRRN2                                                                                                                      |

**SI table.S1: FEM gene modules inferred in EAC TCGA cohort.** Table lists the Entrez gene ID of the seed-gene, its corresponding gene-symbol, the number of genes in the module, the modularity-score of the module, the P-value of significance against randomization, and the symbols of all module members. Text colors indicate the following: boldface Blue: significant hypermethylation and underexpression, boldface Orange: significant hypomethylation and overexpression, Cyan: significant hypermethylation only, Magenta: significant hypomethylation only, Red: significant overexpression only, Green: significant underexpression only and Black: insignificant differential DNAm and mRNA or differential DNAm and differential mRNA display same direction of effect.

| Data resource | Data Type                              | Data Histology                                                              |
|---------------|----------------------------------------|-----------------------------------------------------------------------------|
| GEO(GSE72872) | Illumina Infinium 450K DNA methylation | 125 EAC<br>19 Barrett's<br>63 normal adjacent squamous<br>21 normal stomach |
| GEO(GSE89181) | Illumina Infinium 450K DNA methylation | 24 EAC<br>21 BE<br>18 BE+LGD<br>18 BE+GDG<br>11 normal adjacent squamous    |
| GEO(GSE72874) | RNA-seq                                | 48 EAC<br>17 normal                                                         |
| GEO(GSE92396) | Affymetrix array of gene expression    | 12 EAC<br>10 normal                                                         |

**SI table.S2: EAC bulk tissue cohorts used for validation of FEM-modules.** Table lists accession numbers, data-type, and the distribution of samples according to histology.
